# Supplementary material
Source: HighWire-hosted journal article supplement (https://bmjopen.bmj.com/content/12/7/e048941)
Supplement: inline-supplementary-material-1 [file inline-supplementary-material-1.pdf]

## SUPPLEMENTAL MATERIAL

A multidisciplinary approach to functional somatic syndromes: study protocol for a population-based prospective cohort study

Peyman Adibi, Alireza Ani, Ahmad Vaez, Fatemeh Hadizadeh, Harold Snieder, Hamidreza Roohafza

Table 1. Laboratory tests and instruments used in ISFUN study.

| Laboratory test                                                                                                                                                                                                                        | Baseline | First follow-up | Second follow-up | Third follow-up | Equipment [Laboratory kit provider]                             |
|----------------------------------------------------------------------------------------------------------------------------------------------------------------------------------------------------------------------------------------|----------|-----------------|------------------|-----------------|-----------------------------------------------------------------|
| Complete blood count                                                                                                                                                                                                                   | *        | *               | *                | *               | XN-1000 Hematology Analyzer, Sysmex                             |
| Fasting blood glucose<br>Serum cholesterol<br>Triglycerides<br>LDL/HDL cholesterol<br>cholesterol<br>Aspartate aminotransferase (AST)<br>Alanine aminotransferase (ALT)<br>Alkaline phosphatase test (ALP)<br>C-reactive protein (CRP) | *        | *               | *                | *               | Cobas c 311 analyzer, Roche<br>[Roche diagnostics]              |
| Blood urea nitrogen<br>Serum creatinine, calcium,<br>magnesium, iron                                                                                                                                                                   | *        |                 |                  |                 | Cobas c 311 analyzer, Roche<br>[Roche diagnostics]              |
| Serum ferritin                                                                                                                                                                                                                         | *        | *               | *                | *               | Cobas e 411 analyzer, Roche<br>[Roche diagnostics]              |
| Thyroid-stimulating hormone (TSH)                                                                                                                                                                                                      | *        |                 |                  |                 | Cobas e 411 analyzer, Roche<br>[Roche diagnostics]              |
| Serum zinc                                                                                                                                                                                                                             | *        |                 |                  |                 | BS800M chemistry analyzer, Mindray<br>[Greiner diagnostic]      |
| 25-hydroxy vitamin D                                                                                                                                                                                                                   | *        |                 |                  |                 | HPLC 3345, Rigol-Shimadzu                                       |
| Blood DNA extraction                                                                                                                                                                                                                   | *        |                 |                  |                 | PrimePrep Genomic DNA Isolation Kit (from<br>Blood) - GeNet Bio |
| Stool DNA extraction                                                                                                                                                                                                                   | *        |                 |                  |                 | QIAamp Fast DNA Stool Mini Kit - QIAGEN                         |
| Verifying DNA sample quality                                                                                                                                                                                                           | *        |                 |                  |                 | NanoDrop OneC Spectrophotometer,<br>Thermo Scientific           |
| Gel Documentation Imaging                                                                                                                                                                                                              | *        |                 |                  |                 | E-BOX CX5 TS-20.M, Vilber Lourmat                               |
| Urine metabolome                                                                                                                                                                                                                       | *        | *               | *                | *               | Mass spectrometry (GC-MS)                                       |

Table 2. Phenotype assessment tools and evaluation schedule in ISFUN study.

| Assessment tools                                                     | Baseline | First follow-up | Second follow-up | Third follow-up | Assessed disorders/phenotypes                                                                                                                                                                                                                                        |
|----------------------------------------------------------------------|----------|-----------------|------------------|-----------------|----------------------------------------------------------------------------------------------------------------------------------------------------------------------------------------------------------------------------------------------------------------------|
| <b>Functional somatic syndromes</b>                                  |          |                 |                  |                 |                                                                                                                                                                                                                                                                      |
| Screening for somatoform symptoms[1]                                 | *        | *               | *                | *               | Somatization                                                                                                                                                                                                                                                         |
| Somatic symptom disorder-B criteria scale[2]                         | *        | *               | *                | *               | Symptom-related thoughts, feelings and behaviors                                                                                                                                                                                                                     |
| Functional gastrointestinal disorders (FGID) symptoms checklist[3,4] | *        | *               | *                | *               | Functional globus, functional heartburn, functional dyspepsia, irritable bowel syndrome, functional constipation, functional diarrhea, centrally mediated abdominal pain, functional abdominal pain syndrome                                                         |
| Non-cardiac chest pain checklist                                     | *        | *               | *                | *               | Non-cardiac chest pain                                                                                                                                                                                                                                               |
| Low back pain checklist                                              | *        | *               | *                | *               | Low back pain                                                                                                                                                                                                                                                        |
| Fibromyalgia diagnostic criteria[5]                                  | *        | *               | *                | *               | Fibromyalgia                                                                                                                                                                                                                                                         |
| Pelvic and urinary pain/frequency[6]                                 | *        | *               | *                | *               | Interstitial cystitis, chronic pelvic pain syndrome, sexual pain disorder                                                                                                                                                                                            |
| Sexual function questionnaire[7]                                     | *        | *               | *                | *               | <b>Female:</b> sexual interest/arousal disorder, orgasmic disorder, genitopelvic pain/penetration disorder<br><b>Male:</b> erectile disorder, hypoactive disorder, premature ejaculation, delayed ejaculation                                                        |
| Headache checklist                                                   | *        | *               | *                | *               | Migraine, tension- type, chronic tension- type headaches                                                                                                                                                                                                             |
| <b>Psychological variables</b>                                       |          |                 |                  |                 |                                                                                                                                                                                                                                                                      |
| Diagnostic criteria for psychosomatic research[8]                    | *        | *               | *                | *               | Disease phobia, thanatophobia, health anxiety, illness denial, persistent somatization, functional somatic symptoms secondary to a psychiatric disorder, conversion symptoms, anniversary reaction, irritable mood, type a behavior, demoralization and alexithymia. |
| Hospital anxiety and depression scale[9,10]                          | *        | *               | *                | *               | Anxiety, depression                                                                                                                                                                                                                                                  |
| Body shape questionnaire[11]                                         | *        |                 |                  |                 | Body image disorder                                                                                                                                                                                                                                                  |
| Eating attitudes test[12,13]                                         | *        |                 |                  |                 | Dieting, bulimia and food preoccupation, oral control.                                                                                                                                                                                                               |
| Revised adult attachment scale[14]                                   | *        |                 |                  |                 | Adult attachment styles                                                                                                                                                                                                                                              |
| Neo personality inventory subscales [15,16]                          | *        |                 |                  |                 | Neuroticism, openness to experience                                                                                                                                                                                                                                  |

|                                                           |   |   |   |   |                                                                                                                                                                                       |
|-----------------------------------------------------------|---|---|---|---|---------------------------------------------------------------------------------------------------------------------------------------------------------------------------------------|
| Post-traumatic stress diagnostic scale[17]                | * |   |   |   | Trauma, post-traumatic stress disorder                                                                                                                                                |
| Stressful life event questionnaire[18,19]                 | * | * | * | * | Homelife, financial problems, social relations, personal conflicts, work conflicts, educational concerns, job security, loss and separation, sexual life, daily life, health concerns |
| Modified COPE scale[20,21]                                | * |   |   |   | Positive reinterpretation and growth, problem engagement, acceptance, seeking support, avoidance                                                                                      |
| Warwick-Edinburgh mental wellbeing scale[22]              |   | * | * | * | Wellbeing                                                                                                                                                                             |
| Short-form McGill pain questionnaire[23]                  |   | * | * | * | Pain                                                                                                                                                                                  |
| Sense of coherence questionnaire[24,25]                   |   | * |   |   | Sense of coherence                                                                                                                                                                    |
| Multidimensional scale of perceived social support[26,27] |   | * |   |   | Social support                                                                                                                                                                        |
| <b>Lifestyle checklist</b>                                |   |   |   |   |                                                                                                                                                                                       |
| Food frequency questionnaire[28]                          | * |   |   | * | Food frequency                                                                                                                                                                        |
| Meal pattern checklist[29]                                | * |   |   |   | Meal pattern                                                                                                                                                                          |
| Quality of life short form-12[30]                         | * |   |   | * | Quality of life                                                                                                                                                                       |
| International physical activity questionnaire[31]         | * |   |   | * | Work time, leisure time, transportation                                                                                                                                               |
| Pittsburg sleep quality index[32]                         | * |   |   | * | Subjective sleep quality, sleep latency, sleep duration, sleep disturbances, use of sleeping medication                                                                               |
| Smoking, addiction and drinking checklist                 | * | * | * | * | Waterpipe and cigarettes smoking, drug abuse, alcohol drinking                                                                                                                        |
| <b>Demographic and socio-economic checklist</b>           | * | * | * | * | Health costs, socio-economic status, demographic data                                                                                                                                 |
| <b>Clinical measurements</b>                              |   |   |   |   |                                                                                                                                                                                       |
| Blood pressure measurement                                | * | * | * | * | Systolic and diastolic blood pressure (sphygmomanometer)                                                                                                                              |
| Anthropometric measurements                               | * | * | * | * | Weight and height measurement - neck, chest, waist and hip circumferences, skinfold thickness                                                                                         |
| Pain threshold test                                       | * |   |   |   | Hypersensitivity to pain (Algometer - Somedic Type II, probe of 1.0 cm <sup>2</sup> ; Somedic Production AB, Hörby, Sweden)                                                           |
| Pulmonary function testing                                | * |   |   |   | Lung volumes (Spirometer - MIR spirolab; MIR Co., Roma, Italy)                                                                                                                        |
| Bioelectrical impedance analysis                          | * | * | * | * | Body composition                                                                                                                                                                      |

## References:

- 1 Rief W, Hessel A, Braehler E. Somatization symptoms and hypochondriacal features in the general population. *Psychosomatic medicine* 2001;**63**:595–602.
- 2 Toussaint A, Murray AM, Voigt K, *et al.* Development and validation of the Somatic Symptom Disorder–B Criteria Scale (SSD-12). *Psychosomatic medicine* 2016;**78**:5–12.
- 3 Attanasio V, Andrasik F, Blanchard EB, *et al.* Psychometric properties of the SUNYA revision of the Psychosomatic Symptom Checklist. *Journal of behavioral medicine* 1984;**7**:247–57.
- 4 Palsson OS, Whitehead WE, Chang L, *et al.* Rome IV Diagnostic Questionnaires and Tables for Investigators and Clinicians. *Gastroenterology* 2016.
- 5 Wolfe F, Clauw DJ, Fitzcharles M-A, *et al.* The American College of Rheumatology preliminary diagnostic criteria for fibromyalgia and measurement of symptom severity. *Arthritis care & research* 2010;**62**:600–10.
- 6 Parsons CL, Dell J, Stanford EJ, *et al.* Increased prevalence of interstitial cystitis: previously unrecognized urologic and gynecologic cases identified using a new symptom questionnaire and intravesical potassium sensitivity. *Urology* 2002;**60**:573–8.
- 7 Nomejko A, Dolińska-Zygmunt G. The Sexual Satisfaction Questionnaire–psychometric properties. *Polish Journal of Applied Psychology* 2014;**12**:105–12.
- 8 Porcelli P, Rafanelli C. Criteria for psychosomatic research (DCPR) in the medical setting. *Current psychiatry reports* 2010;**12**:246–54.
- 9 Montazeri A, Vahdaninia M, Ebrahimi M, *et al.* The Hospital Anxiety and Depression Scale (HADS): translation and validation study of the Iranian version. *Health and quality of life outcomes* 2003;**1**:14.
- 10 Zigmond AS, Snaith RP. The hospital anxiety and depression scale. *Acta psychiatrica scandinavica* 1983;**67**:361–70.
- 11 Evans C, Dolan B. Body Shape Questionnaire: derivation of shortened “alternate forms.” *International Journal of Eating Disorders* 1993;**13**:315–21.
- 12 Garner DM, Olmsted MP, Bohr Y, *et al.* The eating attitudes test: psychometric features and clinical correlates. *Psychological medicine* 1982;**12**:871–8.
- 13 Nobakht M, Dezhkam M. An epidemiological study of eating disorders in Iran. *International Journal of Eating Disorders* 2000;**28**:265–71.
- 14 Collins NL, Read SJ. Adult attachment, working models, and relationship quality in dating couples. *Journal of personality and social psychology* 1990;**58**:644.
- 15 Costa PT, McCrae RR. The revised neo personality inventory (neo-pi-r). *The SAGE handbook of personality theory and assessment* 2008;**2**:179–98.

- 16 Haghshenas hasan. Persian version and standardization of NED Personality Inventory-Revised. *Iranian journal of psychiatry and clinical psychology* 1999;**4**:38–48.
- 17 Foa EB, Cashman L, Jaycox L, *et al.* The validation of a self-report measure of posttraumatic stress disorder: The Posttraumatic Diagnostic Scale. *Psychological assessment* 1997;**9**:445.
- 18 Roohafza H, Ramezani M, Sadeghi M, *et al.* Development and validation of the stressful life event questionnaire. *International journal of public health* 2011;**56**:441–8.
- 19 Sali R, Roohafza H, Sadeghi M, *et al.* Validation of the revised stressful life event questionnaire using a hybrid model of genetic algorithm and artificial neural networks. *Computational and mathematical methods in medicine* 2013;**2013**.
- 20 Carver CS, Scheier MF, Weintraub JK. Assessing coping strategies: a theoretically based approach. *Journal of personality and social psychology* 1989;**56**:267.
- 21 Roohafza H, Sadeghi M, Shirani S, *et al.* Association of socioeconomic status and life-style factors with coping strategies in Isfahan Healthy Heart Program, Iran. *Croatian medical journal* 2009;**50**:380–6.
- 22 Tennant R, Hiller L, Fishwick R, *et al.* The Warwick-Edinburgh mental well-being scale (WEMWBS): development and UK validation. *Health and quality of life outcomes* 2007;**5**:63.
- 23 Melzack R. The short-form McGill pain questionnaire. *Pain* 1987;**30**:191–7.
- 24 Alipour A, Sharif N. Validity and reliability of the Sense of Coherence (SOC) questionnaire in university students. *Pajoohandeh Journal* 2012;**17**:50–6.
- 25 Antonovsky A. The structure and properties of the sense of coherence scale. *Social Science & Medicine* 1993;**36**:725–33. doi:[https://doi.org/10.1016/0277-9536\(93\)90033-Z](https://doi.org/10.1016/0277-9536(93)90033-Z)
- 26 Bagherian-Sararoudi R, Hajian A, Ehsan HB, *et al.* Psychometric properties of the Persian version of the multidimensional scale of perceived social support in Iran. *International journal of preventive medicine* 2013;**4**:1277.
- 27 Zimet GD, Dahlem NW, Zimet SG, *et al.* The multidimensional scale of perceived social support. *Journal of personality assessment* 1988;**52**:30–41.
- 28 Barak F, Falahi E, Keshteli AH, *et al.* Adherence to the DASH diet in relation to obesity among Iranian female nurses. *Public Health Nutr* 2013;**18**:705–12.
- 29 Adibi P, Keshteli AH, Esmailzadeh A, *et al.* The study on the epidemiology of psychological, alimentary health and nutrition (SEPAHAN): overview of methodology. *Journal of Research in Medical Sciences* 2012;**17**.
- 30 Ware Jr JE, Kosinski M, Keller SD. A 12-Item Short-Form Health Survey: construction of scales and preliminary tests of reliability and validity. *Medical care* 1996;**34**:220–33.
- 31 Booth M. Assessment of physical activity: an international perspective. *Research quarterly for exercise and sport* 2000;**71**:114–20.

- 32 Buysse DJ, Reynolds CF, Monk TH, *et al.* The Pittsburgh sleep quality index: A new instrument for psychiatric practice and research. *Psychiatry Research* 1989;**28**:193–213.  
doi:[https://doi.org/10.1016/0165-1781\(89\)90047-4](https://doi.org/10.1016/0165-1781(89)90047-4)
